# Supplementary material for: The cell competition-based high-throughput screening identifies small compounds that promote the elimination of RasV12-transformed cells from epithelia
Source: PubMed Central journal article supplement (PMC4612300; doi:10.1038/srep15336), 2015-10-20
Supplement: srep15336-s1.pdf [file srep15336-s1.pdf]

## **Supplementary Information**

### **The cell competition-based high-throughput screening identifies small compounds that promote the elimination of RasV12-transformed cells from epithelia**

Hajime Yamauchi, Takanori Matsumaru, Tomoko Morita, Susumu Ishikawa, Katsumi Maenaka, Ichigaku Takigawa, Kentaro Semba, Shunsuke Kon & Yasuyuki Fujita

Supplementary Figure S1

Supplementary Table 1

Supplementary Table 2

**A**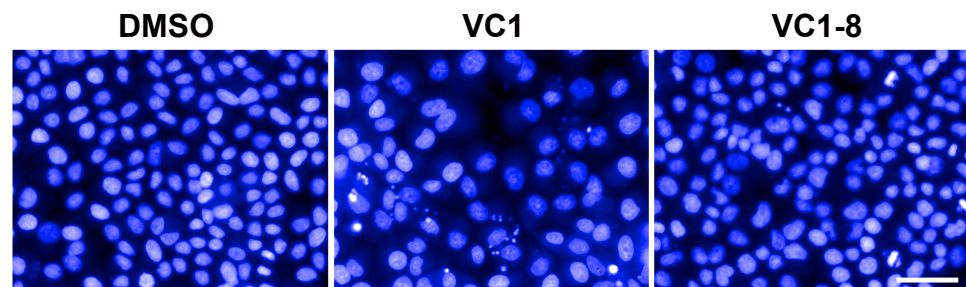**B**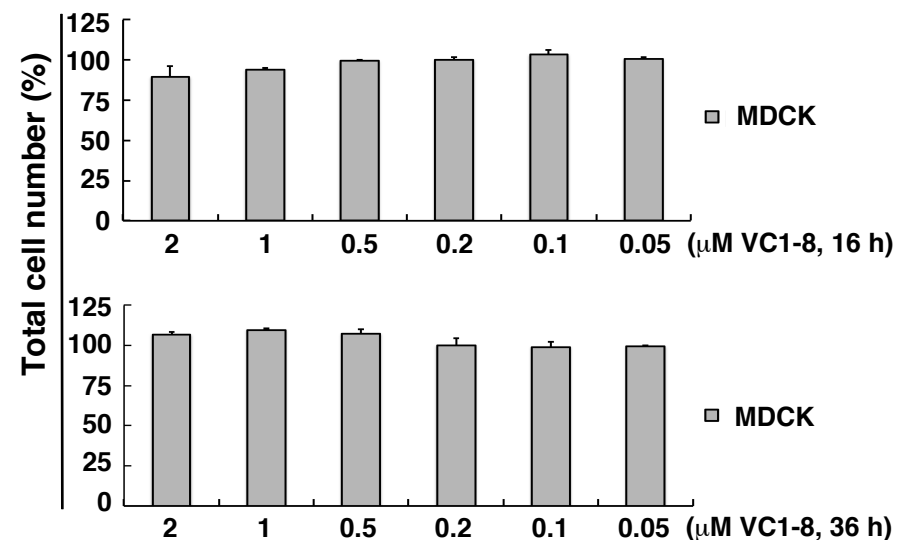

**Supplementary Figure 1 | Cytotoxic effect of VC1 or VC1-8 on normal MDCK cells.**

**(A)** Immunofluorescence images of the nucleus of MDCK cells that are treated with DMSO (left), 2  $\mu\text{M}$  VC1 (middle), or 2  $\mu\text{M}$  VC1-8 (right). Cells are stained with Hoechst 33342 (blue) after 36 h treatment. Scale bar: 50  $\mu\text{m}$ .

**(B)** Dose-dependent effect of VC1-8 on the survival ratio of normal MDCK cells after treatment with VC1-8 for 16 h (top) or 36 h (bottom). Data are mean  $\pm$  SD from three independent experiments. Values are expressed as a ratio relative to DMSO treatment.

**Supplementary Table 1. Small Molecule Screening Data**

| Category            | Parameter                                                                                                                | Description                                                                                                                                        |
|---------------------|--------------------------------------------------------------------------------------------------------------------------|----------------------------------------------------------------------------------------------------------------------------------------------------|
| Assay               | Type of assay                                                                                                            | Cell-based co-culture assay                                                                                                                        |
|                     | Target                                                                                                                   | Promote the elimination of RasV12-transformed cells from the epithelium                                                                            |
|                     | Primary measurement                                                                                                      | GFP intensity of tetracycline-inducible MDCK-pTR GFP-RasV12 cells                                                                                  |
|                     | Key reagents                                                                                                             | Tetracycline                                                                                                                                       |
|                     | Assay protocol<br>Additional comments                                                                                    | Described in METHODS                                                                                                                               |
| Library             | Library size                                                                                                             | 2,607 compounds                                                                                                                                    |
|                     | Library composition                                                                                                      | Known pharmacological activity                                                                                                                     |
|                     | Source                                                                                                                   | Several sources, including LOPAC <sup>1280</sup> (Sigma-Aldrich) and Prestwick chemical compounds (Prestwick Chemical)                             |
|                     | Additional comments                                                                                                      | Compounds were provided by Open Innovation Center for Drug Discovery, Tokyo University                                                             |
| Screen              | Format                                                                                                                   | 96-well, Optically Clear Bottom plates (CellCarrier, PerkinElmer)                                                                                  |
|                     | Concentration(s) tested                                                                                                  | 2 $\mu$ M in 0.5% DMSO                                                                                                                             |
|                     | Plate controls                                                                                                           | Positive control: DMSO and 10 $\mu$ g/ml tetracycline<br>Negative control: DMSO alone                                                              |
|                     | Reagent/ compound dispensing system                                                                                      | Discovery Support Automatic Screening device<br>Hornet-HTS (WAKO)                                                                                  |
|                     | Detection instrument and software                                                                                        | Operetta High Content Imaging System<br>(PerkinElmer)                                                                                              |
|                     | Assay validation/QC                                                                                                      | Z'-score of each assay was 0.548 ~ 0.930                                                                                                           |
|                     | Correction factors                                                                                                       | N/A                                                                                                                                                |
|                     | Normalization                                                                                                            | Normalization of GFP intensity per well was performed for compound treatment on each plate using the average of positive control (as 100% effect). |
| Additional comments | Screened at Center for Research and Education on Drug Discovery, Faculty of Pharmaceutical Sciences, Hokkaido University |                                                                                                                                                    |
| Post-HTS analysis   | Hit criteria                                                                                                             | GFP intensity outside the average $\pm$ 3SD of the positive control                                                                                |
|                     | Hit rate                                                                                                                 | 4.3 %                                                                                                                                              |
|                     | Additional assay(s)                                                                                                      | Secondary and tertiary screening assays (Described in METHODS)                                                                                     |
|                     | Confirmation of hit purity and structure                                                                                 | Hit compounds were repurchased and retested in triplicate                                                                                          |
|                     | Additional comments                                                                                                      |                                                                                                                                                    |

**A**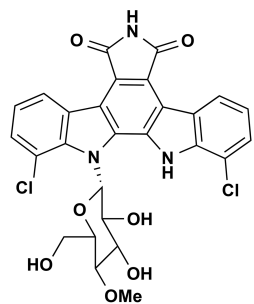**Rebeccamycin  
(=VC1)**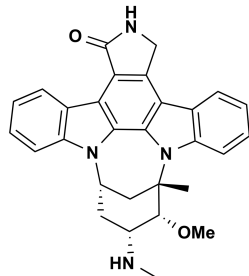**VC1-1**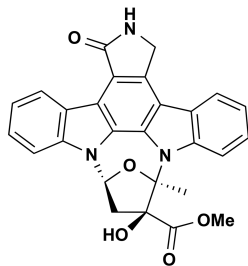**VC1-2**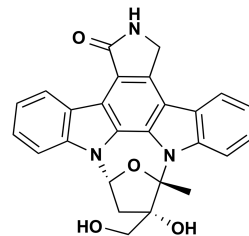**VC1-3**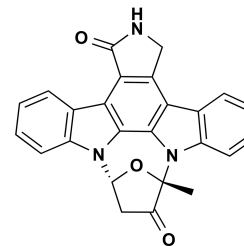**VC1-4**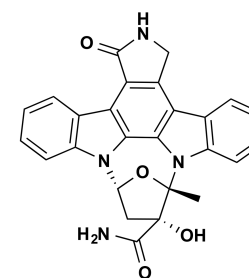**VC1-5**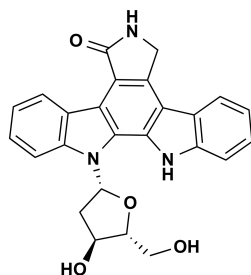**VC1-6**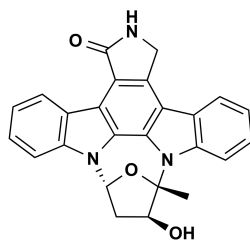**VC1-7**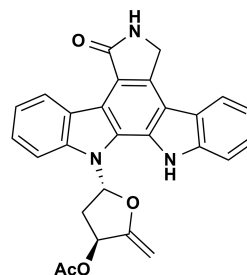**VC1-8**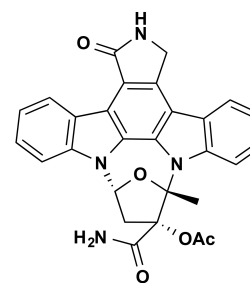**VC1-9**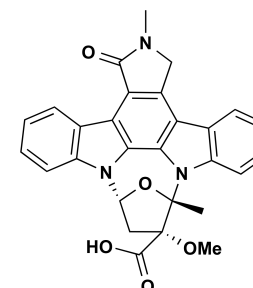**VC1-10****B**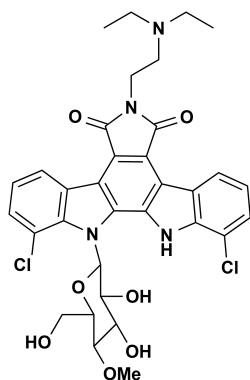**NSC-655649**

**Supplementary Table 2 | Structural formulae of Rebeccamycin and its analogous compounds.**  
**(A) Structural formulae of analogue compounds of Rebeccamycin we have analyzed in this study.**  
**(B) A structural formula of NSC65549.**
